# Supplementary material for: Large scale synthesis of carbon dots for efficient luminescent solar concentrators
Source: Royal Society of Chemistry journal article supplement (doi:10.1039/d2tc04285a), 2022-01-01
Supplement: d2tc04285a1.pdf [file d2tc04285a1.pdf]

## Large-scale synthesis of Carbon Quantum Dots for Efficient Luminescent Solar Concentrators

Bingxu Liu<sup>#,1</sup>, Lihua Wang<sup>#,1</sup>, Xiao Gong<sup>2,\*</sup>, Haiguang Zhao<sup>1,\*</sup>, Yuanming Zhang<sup>1,\*</sup>

<sup>1</sup>College of Physics, College of Textiles and Clothes, State Key Laboratory of Bio-Fibers and Eco-Textiles, Qingdao University, No. 308 Ningxia Road, Qingdao 266071, P. R. China.

<sup>2</sup>State Key Laboratory of Silicate Materials for Architectures, Wuhan University of Technology, Wuhan 430070, P. R. China.

<sup>#</sup>These authors contributed equally.

\*Corresponding authors. Email: [xgong@whut.edu.cn](mailto:xgong@whut.edu.cn); [Zhangyuanming001@163.com](mailto:Zhangyuanming001@163.com); [hgzhao@qdu.edu.cn](mailto:hgzhao@qdu.edu.cn)

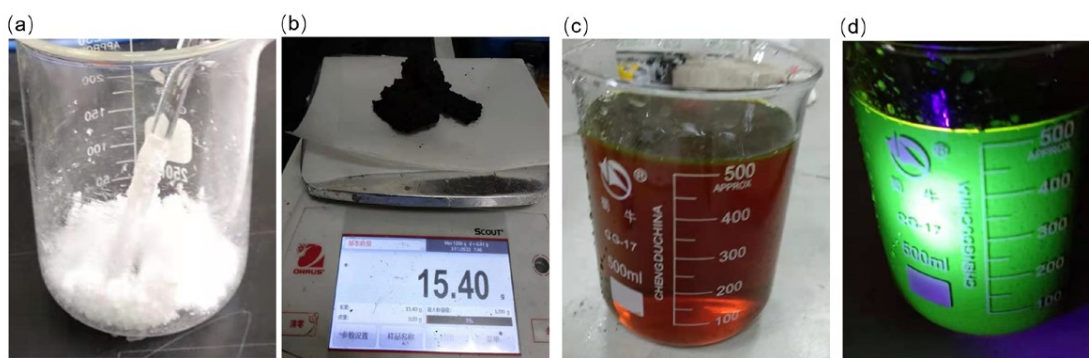

**Fig. S1** (a) The mixture of the CA (5 g),  $\text{CaCl}_2$  (5 g) and urea (10 g); (b) The slurry (15.4 g) after the solid-state reaction; (c-d) The dispersed C-dots in methanol under room light (c) and UV illumination (d).

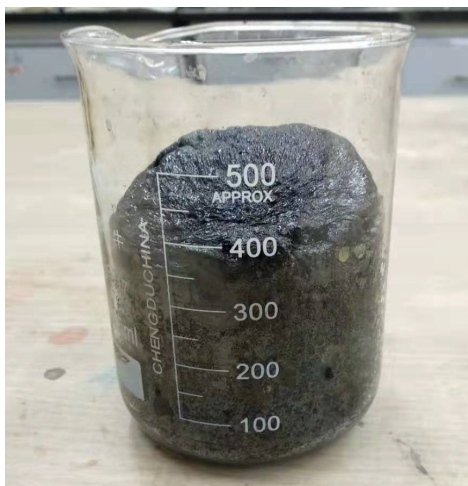

**Fig. S2** The solid powder after reaction using CA (200 g),  $\text{CaCl}_2$  (200 g) and urea (400 g) as precursors.

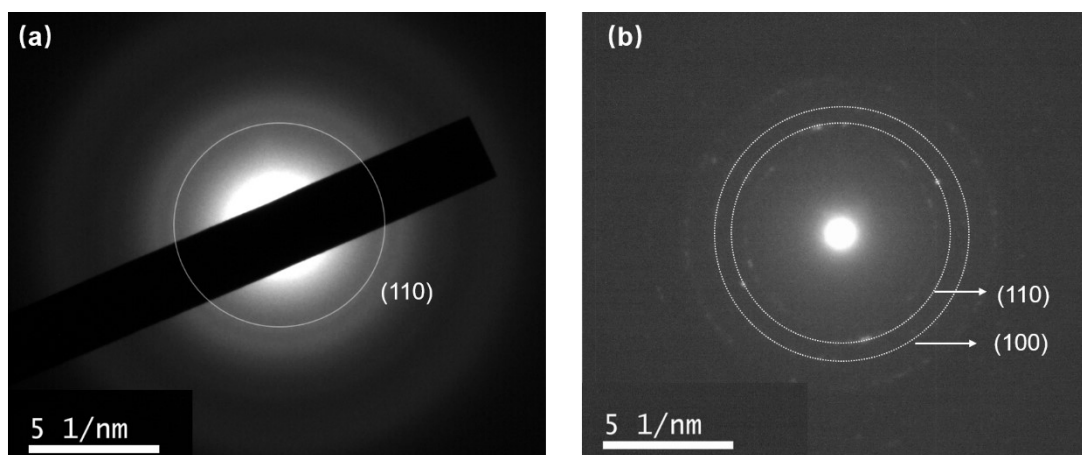

**Fig. S3** SAED pattern of C-dots produced by (a) CaCA and (b) CA+ $\text{CaCl}_2$ . The C-dots have a typical cubic carbon structure (#75-0222).

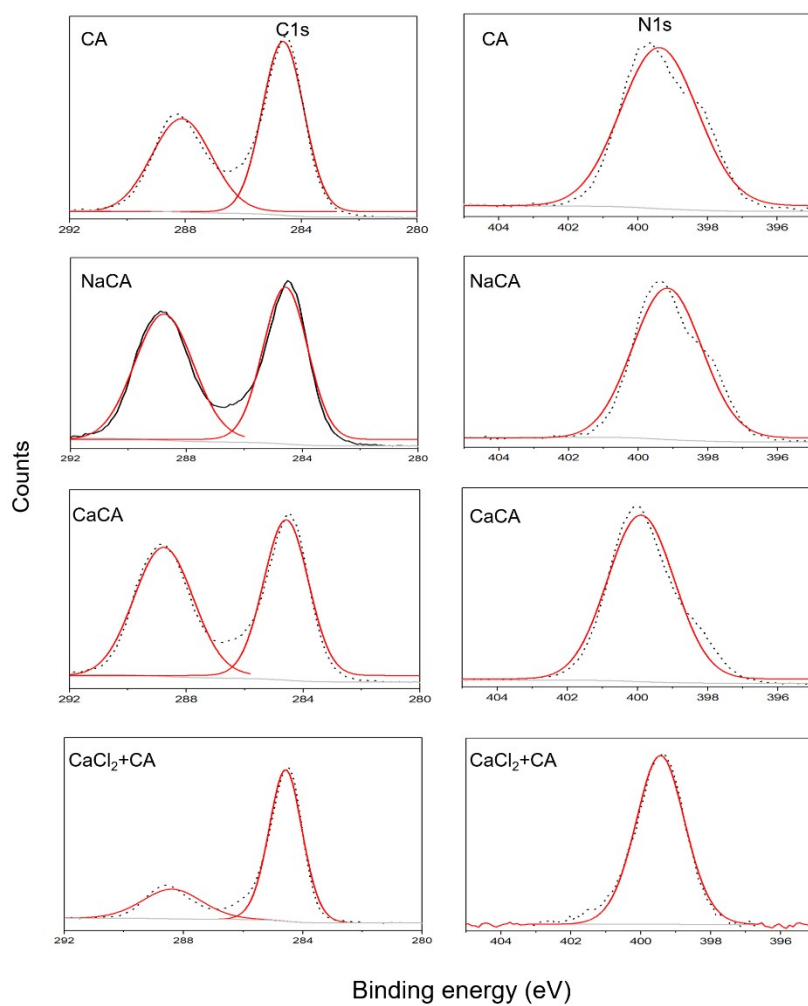

**Fig. S4** High resolution C1s and N1s spectra of the C-dots produced with different precursors.

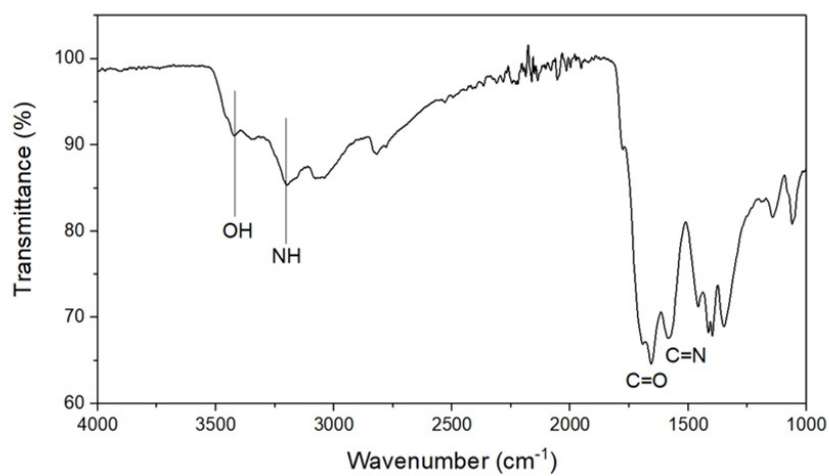

**Fig. S5** FT-IR spectrum of the C-dots produced using CaCA/urea as precursors.

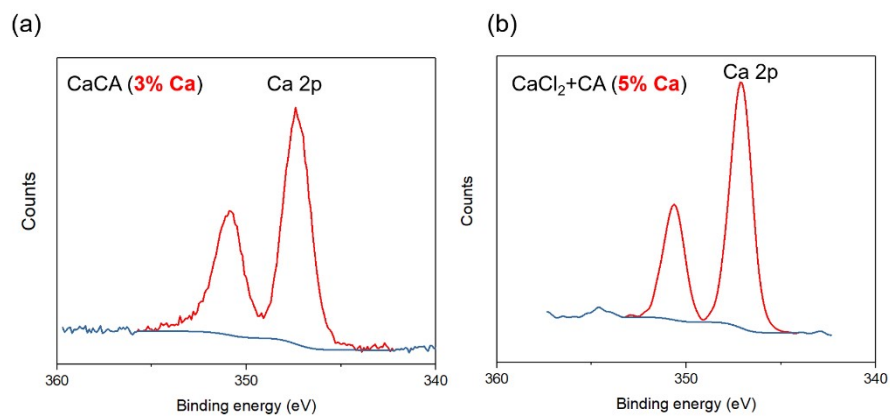

**Fig. S6** High resolution Ca 2p spectra of the C-dots produced with different precursors.

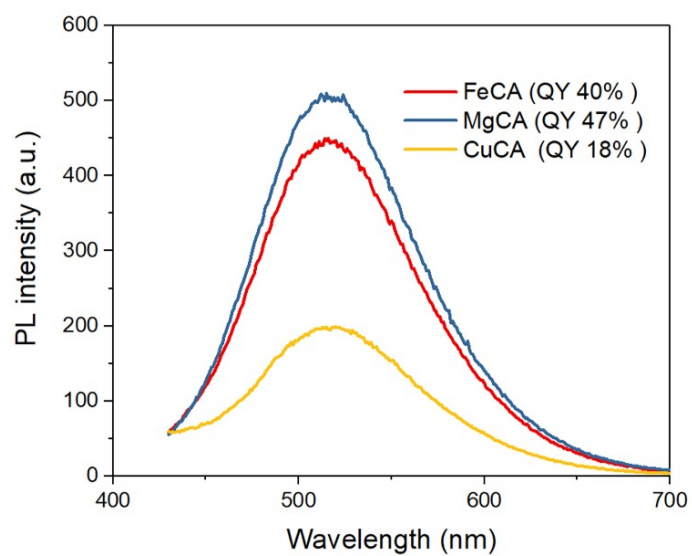

**Fig. S7** PL spectra of the C-dots produced using FeCA/urea, MgCA/urea and CuCA/urea as precursors.

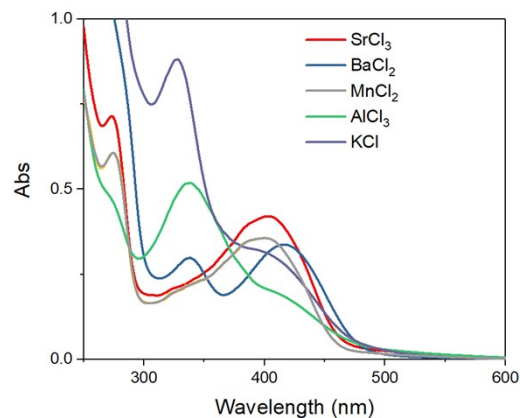

**Fig. 8** Absorption of C-dots synthesized using different metal chloride. The purified C-dots were dispersed in water for measurements.

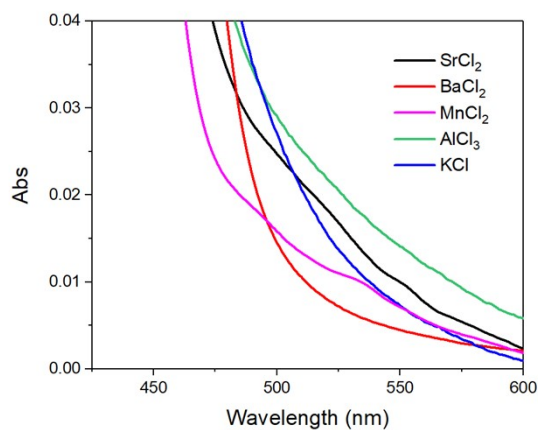

**Fig. 9** High resolution absorption of C-dots in the emission range.

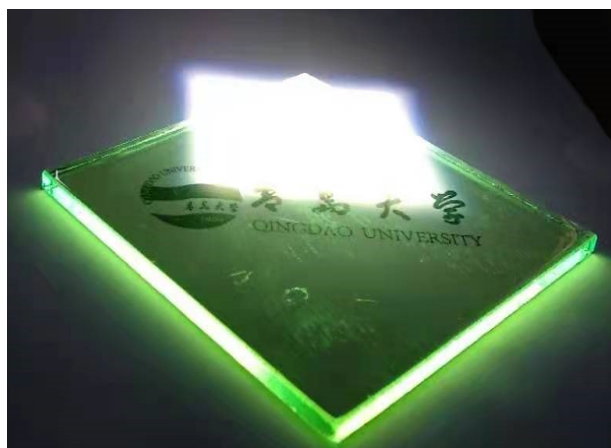

**Fig. S10** Photographs of the LSC based on C-dots synthesized using CaCA/urea as precursors under one sun ( $100 \text{ mW/cm}^2$ ) illumination. LSC dimensions,  $10 \times 10 \times 0.43 \text{ cm}^3$ .

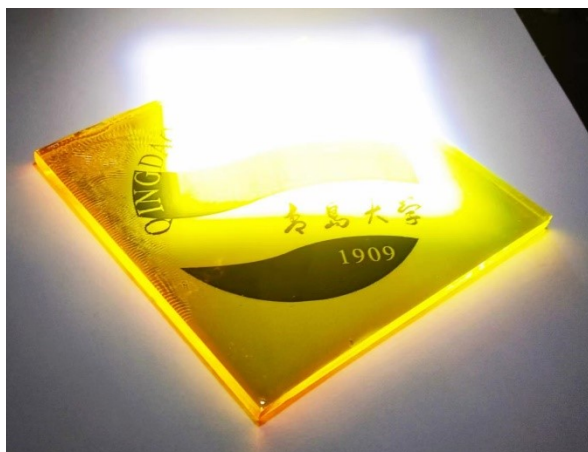

**Fig. S11** Photographs of the LSC based on C-dots synthesized using CA/urea/MnCl<sub>2</sub> as precursors under one sun (100 mW/cm<sup>2</sup>) illumination. LSC dimensions, 10 × 10 × 0.43 cm<sup>3</sup>.

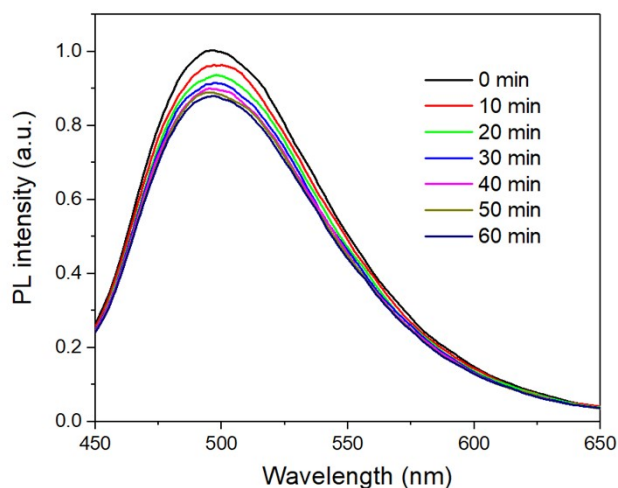

**Fig. S12** The PL spectrum of the LSC based on the C-dots produced by CA/urea. The LSC was illuminated by the UV light for different time.

**Table S1** The calculated cost of the C-dots produced by solid-state reaction. The calculation only considers the cost of chemicals used for the synthesis.

|                                | Price \$/Kg | Link                                                                                                    |
|--------------------------------|-------------|---------------------------------------------------------------------------------------------------------|
| CaCA                           | 60          | <a href="https://www.aladdin-e.com/zh_cn/c194985.html">https://www.aladdin-e.com/zh_cn/c194985.html</a> |
| CA                             | 20          | <a href="https://www.aladdin-e.com/zh_cn/c112635.html">https://www.aladdin-e.com/zh_cn/c112635.html</a> |
| Urea                           | 14          | <a href="https://www.aladdin-e.com/zh_cn/u111897.html">https://www.aladdin-e.com/zh_cn/u111897.html</a> |
| CaCl <sub>2</sub>              | 14          | <a href="https://www.aladdin-e.com/zh_cn/c399250.html">https://www.aladdin-e.com/zh_cn/c399250.html</a> |
| BaCl <sub>2</sub>              | 20          | <a href="https://www.aladdin-e.com/zh_cn/b111752.html">https://www.aladdin-e.com/zh_cn/b111752.html</a> |
| C-dots (CaCA)                  | 368         |                                                                                                         |
| C-dots (CA+CaCl <sub>2</sub> ) | 83          |                                                                                                         |

For the C-dots using CaCA (~520 g) and urea (~400 g), the yield is 11%, the price of C-dots is 0.4 \$/g.

For the C-dots using CA, urea and  $\text{CaCl}_2$ , the yield is 25%, the price of C-dots is 0.08\$/g.  
For the C-dots using CA, urea and  $\text{BaCl}_2$ , the yield is 25%, the price of C-dots is 0.1\$/g.
